# Supplementary material for: Strong Correlations between the Binding Antibodies against Wild-Type and Neutralizing Antibodies against Omicron BA.1 and BA.2 Variants of SARS-CoV-2 in Individuals Following Booster (Third-Dose) Vaccination
Source: MDPI journal article supplement (doi:10.3390/diagnostics12081781), 2022-07-22
Supplement: s1 [file s1]

**S1 Table** Spearman’s rank correlation analysis between anti-RBD IgG, the percentage of inhibition measured by surrogate virus neutralization test (sVNT) and FRNT50 titers against omicron BA.1 and BA.2

|                                                    | n   | Spearman’s r | p -value  |
|----------------------------------------------------|-----|--------------|-----------|
| Anti-RBD IgG vs FRNT50 titers against omicron BA.1 | 310 | 0.89         | $p<0.001$ |
| Anti-RBD IgG vs FRNT50 titers against omicron BA.2 | 310 | 0.86         | $p<0.001$ |
| sVNT vs FRNT50 titers against omicron BA.1         | 218 | 0.77         | $p<0.001$ |
| sVNT vs FRNT50 titers against omicron BA.2         | 218 | 0.79         | $p<0.001$ |

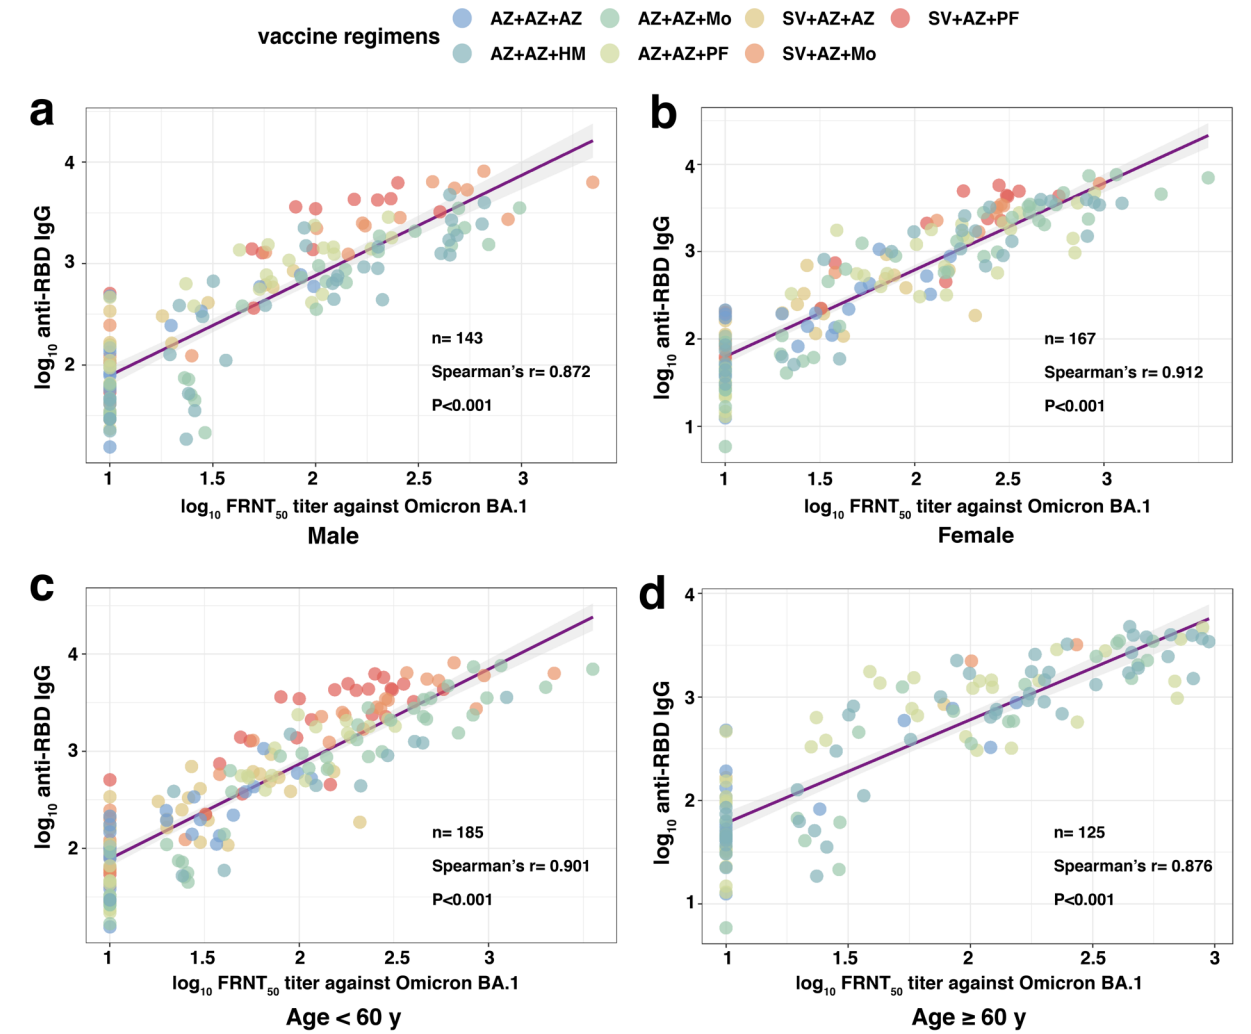

**Figure S1** Spearman's rank correlation between anti-RBD IgG and FRNT50 titers against omicron BA.1 determined underlying the groups of age and sex. Individuals with booster vaccination were classified and analyzed by groups of sex, (a) male and (b) female, by ages (c) age <60 years old and (d) age  $\geq$  60 years old. FRNT50, foci reduction neutralization test 50; RBD, receptor-binding domain.

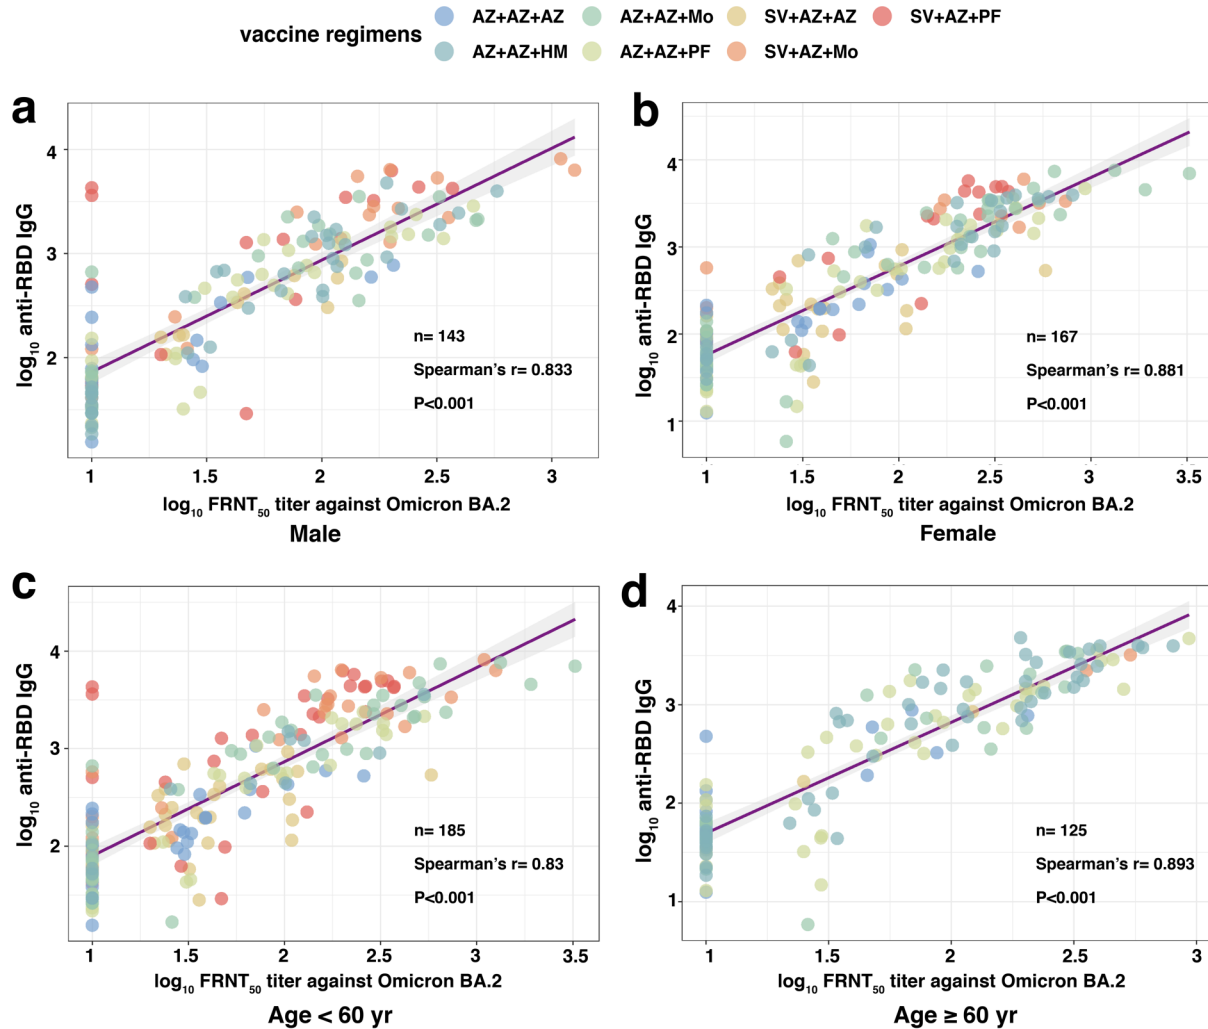

**Figure S2** Spearman's rank correlation between anti-RBD IgG and FRNT50 titers against omicron BA.2 determined underlying the groups of age and sex. Individuals with booster vaccination were classified and analyzed by groups of sex, (a) male and (b) female, by ages (c) age <60 years old and (d) age  $\geq$  60 years old. FRNT50, foci reduction neutralization test 50; RBD, receptor-binding domain.

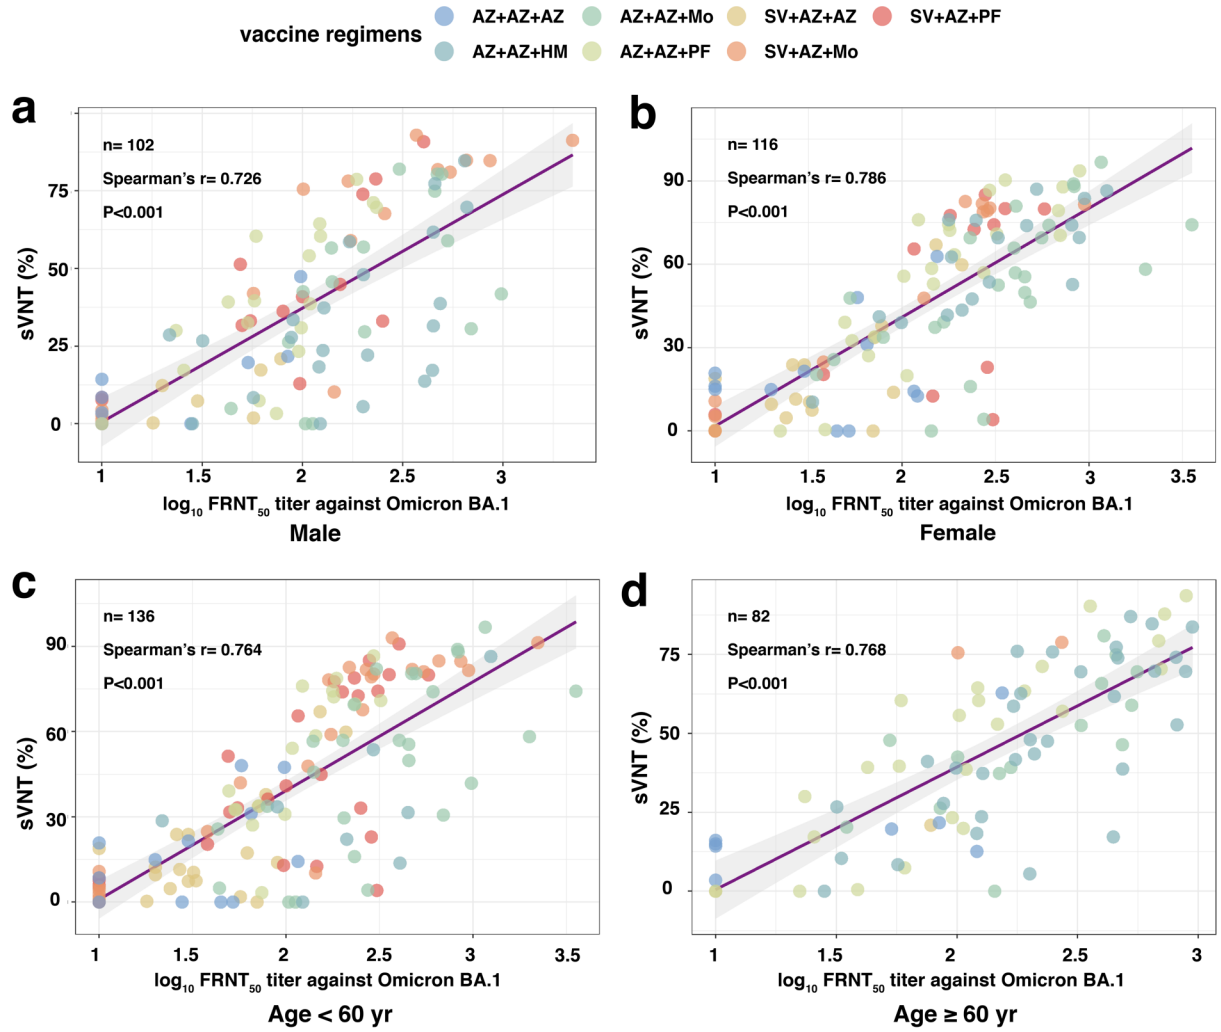

**Figure S3** Spearman's rank correlation between the percentage of inhibition measured by sVNT and FRNT50 titers against omicron BA.1 determined underlying the groups of age and sex. Individuals with booster vaccination were classified and analyzed by groups of sex, (a) male and (b) female, by ages (c) age <60 years old and (d) age  $\geq$  60 years old. FRNT50, foci reduction neutralization test 50; sVNT, surrogate virus neutralization test.

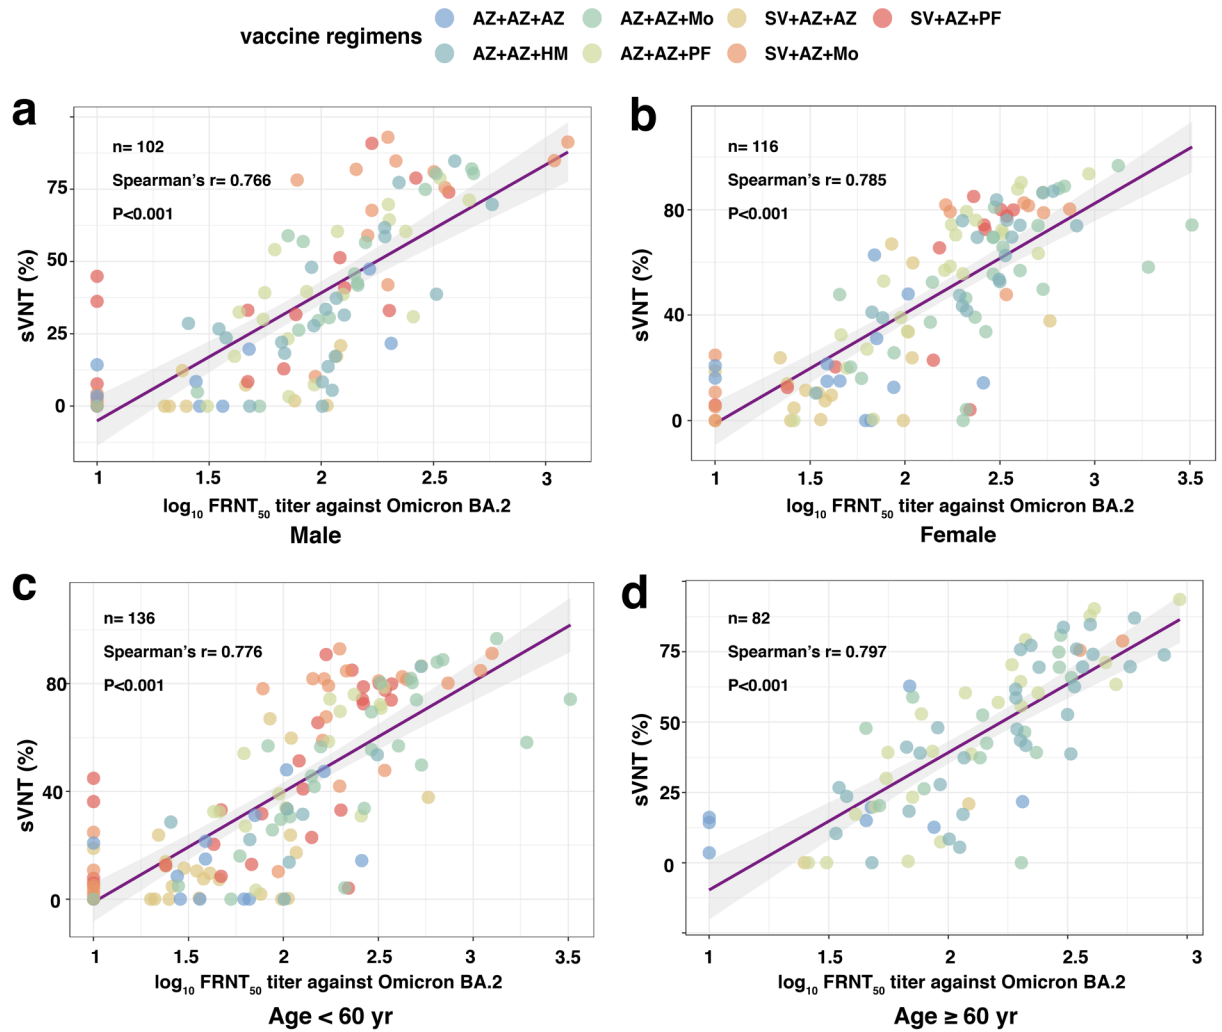

**Figure S4** Spearman's rank correlation between the percentage of inhibition measured by sVNT and FRNT50 titers against omicron BA.2 determined underlying the groups of age and sex. Individuals with booster vaccination were classified and analyzed by groups of sex, (a) male and (b) female, by ages (c) age <60 years old and (d) age  $\geq$  60 years old. FRNT50, foci reduction neutralization test 50; sVNT, surrogate virus neutralization test.
